# Supplementary material
Source: PubMed Central journal article supplement (PMC5716346)
Supplement: NIHMS873793-supplement-s3.pdf [file NIHMS873793-supplement-s3.pdf]

Table S1

| Strain              | Genotype                                                                                                  | Description                                                                                         |
|---------------------|-----------------------------------------------------------------------------------------------------------|-----------------------------------------------------------------------------------------------------|
| N2                  | wild-type                                                                                                 | Wild-type                                                                                           |
| PD8753              | <i>dcr-1(ok247) III/hT2 [bli-4(e937) let-?(q782) qls48] (I;III)</i> .                                     | Dicer mutant                                                                                        |
| RF103               | <i>rrf-1(ok589) I</i>                                                                                     | RNAi in the germline                                                                                |
| RF104               | <i>rrf-1(ok589) I; alg-2(ok304) II</i>                                                                    | RNAi in the germline with <i>alg-2</i> mutation                                                     |
| RF849               | <i>alg-2(ok304) II; rde-1(ne219) V; xwEx189 [mir786<sup>prom</sup>::rde-1(+):unc-54<sup>3' UTR</sup>]</i> | RNAi in the somatic gonad                                                                           |
| RF851               | <i>alg-2(ok304) II; rde-1(ne219) V</i>                                                                    | Control for RF849                                                                                   |
| RF855               | <i>pash-1(mj100) I</i>                                                                                    | Pasha mutants; <i>pash-1(mj100)</i> mutants isolated from SX1359 strain without the rescuing array. |
| RF862               | <i>unc-119(ed3) III; rde-1(ne219) V; xwTi2[inx-8<sup>prom</sup>::rde-1(+):unc-54<sup>3' UTR</sup>] X</i>  | RNAi in the sheath cells; <i>xwTi2</i> location X 8805171bp (intron)                                |
| RF864               | <i>xwTi1 [inx-8<sup>prom</sup>::rde-1(+):unc-54<sup>3' UTR</sup>]; unc-119(ed3) III, rde-1(ne219) V</i>   | RNAi in the sheath cells; <i>xwTi1</i> location III 3994771bp                                       |
| RF878               | <i>oxTi76 IV; rde-1(ne219) V; unc-119(ed3) xwTi1 III</i>                                                  | Control strain to validate tissue specific RNAi in the sheath cells                                 |
| RF884               | <i>oxTi76 IV; rde-1(ne219) V; xwTi2 X; unc-119 III</i>                                                    | Control strain to validate tissue specific RNAi in the sheath cells                                 |
| RF885               | <i>xwTi5 [pie-1<sup>prom</sup>::rde-1(+):tbb-2<sup>3' UTR</sup>]IV; rde-1(ne219) V</i>                    | RNAi in the germline; <i>xwTi5 IV</i> 172,923,205bp                                                 |
| RF922               | <i>alg-2(ok304) II; rde-1(ne219) V; xwTi5 [pie-1<sup>prom</sup>::rde-1(+):tbb-2<sup>3' UTR</sup>]</i>     | RNAi in germline                                                                                    |
| SX1359 <sup>a</sup> | <i>pash-1(mj100) I; mjEx331</i>                                                                           | Pasha temperature sensitive mutant with rescue array                                                |
| VC1138              | <i>drsh-1(ok369) I/hT2 [bli-4(e937) let-?(q782) qls48] (I;III)</i> .                                      | Drosha mutant                                                                                       |
| RF102               | <i>alg-2(ok304) II</i>                                                                                    | <i>alg-2</i> mutant                                                                                 |
| WM27                | <i>rde-1(ne219) V</i>                                                                                     | RNAi resistant                                                                                      |

<sup>a</sup> Strain provided by Eric Miska, Lehrbach et al, 2012
